# Supplementary material for: Translating Evidence to Facilitate Shared Decision Making: Development and Usability of a Consult Decision Aid Prototype
Source: Springer Nature journal article supplement (doi:10.1007/s40271-016-0177-9), 2016-05-11
Supplement: MOESM1 [file 24126920]

# Should you take alendronate for osteoporosis?

A Cochrane Decision Aid for patients and doctors to [discuss options](#)

## 1. Why are you being offered alendronate for osteoporosis?

- Osteoporosis (also called [low bone density](#)) weakens your bones and causes the loss of minerals like calcium. It is more common in women after menopause. You are more likely to break a hip, wrist or spine after a bump or fall. You may already be managing osteoporosis with regular walking or exercise, Vitamin D and calcium supplements.
- Alendronate is an option if you are a woman who has been through menopause, broken a bone recently, and told you have osteoporosis. It may prevent another bone break. There are other options including other drugs.

## 2. What are your options?

 **Take alendronate:** You take a pill by mouth and must sit upright or stand for 30 minutes before eating in the morning to avoid esophagus irritation. Depending on the dose, it is taken once a day or once a week.

 **Not take alendronate.** You may wish to discuss other treatment options with your doctor.

## 3. What do you think of the benefits and risks of each option?

- Shown below are the [best estimates](#) of what happens to 100 women with osteoporosis who take or do not take alendronate over 1 to 4 years. [Link to a more detailed table.](#)
- Review the table, add other reasons you may have to choose/avoid options and rate each benefit and risk using stars to show how much each one matters to you.
- Other information to consider: allergies, cost, safe with other drugs, length of treatment, ways to manage side effects and changes in side effects over time.

|                                                                                                                                                     | Take alendronate<br> | Not take alendronate<br> | How much does this matter to you?<br>0★ (not at all)<br>5★ (a great deal)<br> |
|-----------------------------------------------------------------------------------------------------------------------------------------------------|--------------------------------------------------------------------------------------------------------|--------------------------------------------------------------------------------------------------------------|-------------------------------------------------------------------------------------------------------------------------------------------------------------------|
| <b>Benefits or Reasons to Choose alendronate</b>                                                                                                    |                                                                                                        |                                                                                                              |                                                                                                                                                                   |
| 5 fewer women break a hip <sup>[+++]</sup>                                                                                                          | 4 out of 100                                                                                           | 9 out of 100                                                                                                 | ★★★★★                                                                                                                                                             |
| It slows down the loss of minerals in the bones                                                                                                     | Yes                                                                                                    | No                                                                                                           | ★★★★★                                                                                                                                                             |
| Add other reasons to choose alendronate:                                                                                                            |                                                                                                        |                                                                                                              | ★★★★★                                                                                                                                                             |
| <b>Risks or Reasons to Avoid alendronate</b>                                                                                                        |                                                                                                        |                                                                                                              |                                                                                                                                                                   |
| The same number of women stop treatment with both options due to side effects (such as stomach problems or ulcers in the esophagus) <sup>[++]</sup> |                                                                                                        | 9 out of 100                                                                                                 | ★★★★★                                                                                                                                                             |
| 1 more woman has serious harms ( <a href="#">jaw damage</a> ) if 10,000 women take alendronate for about 2 years <sup>[+]</sup>                     | 1 out of 10,000                                                                                        | 0 out of 10,000                                                                                              | ★★★★★                                                                                                                                                             |
| Inconvenience of taking alendronate (sitting upright or standing for 30 minutes before eating in the morning)                                       | Yes                                                                                                    | No                                                                                                           | ★★★★★                                                                                                                                                             |
| Add other reasons to avoid alendronate:                                                                                                             |                                                                                                        |                                                                                                              | ★★★★★                                                                                                                                                             |

4. Which option do you prefer?  Take alendronate  Not take alendronate  Unsure

## 5. What are your decision making needs?

- Do you feel sure about the best choice for you?  Yes  No
- Do you know the benefits and risks of each option?  Yes  No
- Are you clear about which benefits and risks matter most to you?  Yes  No
- Do you have enough support and advice to make a choice?  Yes  No

[The SURE Test](#)
